# Supplementary material for: Altered awareness of action in Parkinson’s disease: evaluations by explicit and implicit measures
Source: PubMed Central journal article supplement (PMC5556120; doi:10.1038/s41598-017-08482-0), 2017-08-14
Supplement: 41598_2017_8482_MOESM1_ESM.pdf [file 41598_2017_8482_MOESM1_ESM.pdf]

**Altered awareness of action in Parkinson's disease:  
evaluations by explicit and implicit measures**

Naho Saito, Keisuke Takahata, Hodaka Yamakado, Nobukatsu Sawamoto,  
Satoshi Saito, Ryosuke Takahashi, Toshiya Murai, Hidehiko Takahashi\*

\* Correspondence should be addressed to Hidehiko Takahashi,  
Department of Psychiatry, Kyoto University Graduate School of Medicine,  
54 Shogoin-Kawahara-cho, Sakyo-ku, Kyoto 606-8507, Japan  
Tel: +81-75-751-3386, Fax: +81-75-751-3246  
E-mail: [hidehiko@kuhp.kyoto-u.ac.jp](mailto:hidehiko@kuhp.kyoto-u.ac.jp)

**Supplementary Table S1**

|                                     | <b>Experiment 1</b> |              | <b>Experiment 2</b> |                    |
|-------------------------------------|---------------------|--------------|---------------------|--------------------|
|                                     | Action Binding      | Tone Binding | Angular condition   | Temporal condition |
| <b>Parkinson's Disease patients</b> |                     |              |                     |                    |
| Age                                 | 0.39 (0.09)         | -0.39 (0.10) | -0.04 (0.87)        | 0.20 (0.43)        |
| UPDRS motor subscale                | 0.04 (0.88)         | -0.12 (0.63) | 0.20 (0.43)         | 0.18 (0.49)        |
| Total daily LED                     | 0.20 (0.41)         | 0.01 (0.97)  | 0.04 (0.87)         | 0.00 (1.00)        |
| BDI                                 | -0.14 (0.58)        | -0.22 (0.36) | 0.33 (0.19)         | 0.43 (0.07)        |
| Apathy Scale                        | 0.04 (0.88)         | 0.13 (0.60)  | -0.14 (0.58)        | -0.15 (0.56)       |
| General Self Efficacy Scale         | 0.07 (0.77)         | -0.37 (0.12) | 0.11 (0.66)         | 0.16 (0.54)        |
| Cognistat                           | -0.23 (0.34)        | -0.05 (0.84) | -0.18 (0.48)        | -0.16 (0.53)       |
| <b>Controls</b>                     |                     |              |                     |                    |
| Age                                 | -0.28 (0.17)        | 0.07 (0.75)  | -0.07 (0.75)        | 0.22 (0.29)        |
| BDI                                 | 0.21 (0.31)         | -0.33 (0.11) | 0.11 (0.60)         | -0.09 (0.68)       |
| Apathy Scale                        | -0.14 (0.51)        | -0.17 (0.41) | 0.19 (0.36)         | 0.12 (0.56)        |
| General Self Efficacy Scale         | 0.21 (0.31)         | 0.20 (0.33)  | -0.01 (0.95)        | -0.28 (0.18)       |
| Cognistat                           | 0.03 (0.90)         | 0.02 (0.91)  | -0.12 (0.57)        | -0.38 (0.06)       |

Correlations between performances of the experiments (Action/Tone Binding in Experiment 1, total number of “yes” responses in the two conditions in Experiment 2) and covariates by Spearman rank correlations. Correlation coefficients ( $\rho$ ) are shown in the table. *P* values are shown in parentheses.
